# Supplementary material
Source: ML conference proceedings conference paper supplement (https://openreview.net/forum?id=S4kvQ7_XBxP)
Supplement: supplementary_material [file attachment]

# On sparse connectivity, adversarial robustness, and a novel model of the artificial neuron: supplementary materials

Anonymous ECCV submission

Paper ID 0006

## 1 Appendix A: proofs of theorems 1 and 2

*Theorem 1:  $L_\infty$ -nonexpansive AND problem.*  $\exists! f(x, y) = \min(x, y)$  such that following holds:

C1  $f(x, y)$  is defined for  $x, y \in [0, 1]$

C2  $f(0, 0) = f(0, 1) = f(1, 0) = 0, \quad f(1, 1) = 1$

C3  $a \leq A, \quad b \leq B \implies f(a, b) \leq f(A, B)$  (monotonicity)

C4  $|f(a + \Delta a, b + \Delta b) - f(a, b)| \leq \max(|\Delta a|, |\Delta b|)$

*Proof.* We will prove Theorem 1 by demonstrating that conditions C1...C4 constrain  $f(x, y)$  in such a way that the only possible solution is  $f(x, y) = \min(x, y)$ .

The monotonicity condition C3 combined with C2 means that

$$\forall y \in [0, 1] \quad f(0, y) = 0 \quad (1)$$

Conditions C3 (monotonicity) and C4 (nonexpansivity), when combined with 'reference' function values  $f(0, 0)$  and  $f(1, 1)$ , constrain  $f$  along line connecting these two points:

$$|f(y, y) - f(0, 0)| \leq |y| \implies f(y, y) - 0 \leq y \implies f(y, y) \leq y \quad (2)$$

$$|f(1, 1) - f(y, y)| \leq |1 - y| \implies 1 - f(y, y) \leq 1 - y \implies f(y, y) \geq y \quad (3)$$

As result, we have

$$\forall y \in [0, 1] \quad f(y, y) = y \quad (4)$$

Similarly to the previous paragraph, nonexpansivity condition C4 combined with equations 1 and 4 constrains  $f(x, y)$  along line connecting points  $(0, y)$  and  $(y, y)$ , i.e.  $\forall 0 \leq x \leq y \leq 1$  following holds:

$$|f(x, y) - f(0, y)| \leq |x| \implies f(x, y) - 0 \leq x \implies f(x, y) \leq x \quad (5)$$

$$|f(y, y) - f(x, y)| \leq |y - x| \implies y - f(x, y) \leq y - x \implies f(x, y) \geq x \quad (6)$$

As result, we have

$$\forall 0 \leq x \leq y \leq 1 \quad f(x, y) = x = \min(x, y)$$

Due to the symmetry of the problem, it is obvious that the following also holds:

$$\forall 0 \leq y \leq x \leq 1 \quad f(x, y) = y = \min(x, y)$$

So, finally,

$$\forall x, y \in [0, 1] \quad f(x, y) = \min(x, y)$$

what was to be shown.

*Theorem 2:  $L_\infty$ -nonexpansive OR problem.*  $\exists!$   $g(x, y) = \max(x, y)$  such that following holds:

C1  $g(x, y)$  is defined for  $x, y \in [0, 1]$

C2  $g(0, 0) = 0, \quad g(0, 1) = g(1, 0) = g(1, 1) = 1$

C3  $a \leq A, \quad b \leq B \implies g(a, b) \leq g(A, B)$  (monotonicity)

C4  $|g(a + \Delta a, b + \Delta b) - g(a, b)| \leq \max(|\Delta a|, |\Delta b|)$

*Proof.* Similarly to the previous proof, we will prove Theorem 2 by demonstrating that conditions C1...C4 constrain  $g(x, y)$  in such a way that the only possible solution is  $g(x, y) = \max(x, y)$ .

The monotonicity condition C3, when combined with 'reference' function values  $g(1, 0)$  and  $g(1, 1)$ , constrains  $g$  along line connecting these two points:

$$\forall y \in [0, 1] \quad g(1, y) = 1 \tag{7}$$

Similarly, conditions C3 (monotonicity) and C4 (nonexpansivity), when combined with 'reference' function values  $g(0, 0)$  and  $g(1, 1)$ , constrain  $g$  along line connecting these two points:

$$|g(y, y) - g(0, 0)| \leq |y| \implies g(y, y) - 0 \leq y \implies g(y, y) \leq y \tag{8}$$

$$|g(1, 1) - g(y, y)| \leq |1 - y| \implies 1 - g(y, y) \leq 1 - y \implies g(y, y) \geq y \tag{9}$$

As result, we have

$$\forall y \in [0, 1] \quad g(y, y) = y \tag{10}$$

Similarly to previous paragraphs, nonexpansivity condition C4 combined with equations 7 and 10 constrains  $g(x, y)$  along line connecting points  $(y, y)$  and  $(1, y)$ , i.e.  $\forall 0 \leq y \leq x \leq 1$  following holds:

$$|g(1, y) - g(x, y)| \leq |1 - x| \implies 1 - g(x, y) \leq 1 - x \implies g(x, y) \geq x \quad (11)$$

$$|g(x, y) - g(y, y)| \leq |x - y| \implies g(x, y) - y \leq x - y \implies g(x, y) \leq x \quad (12)$$

As result, we have

$$\forall 0 \leq y \leq x \leq 1 \quad g(x, y) = x = \max(x, y)$$

Due to the symmetry of the problem, it is obvious that the following also holds:

$$\forall 0 \leq x \leq y \leq 1 \quad g(x, y) = y = \max(x, y)$$

So, finally,

$$\forall x, y \in [0, 1] \quad g(x, y) = \max(x, y)$$

what was to be shown.
